# Supplementary material
Source: PubMed Central journal article supplement (PMC4561677)
Supplement: AEM.01688-15_zam999116610so1.pdf [file AEM.01688-15_zam999116610so1.pdf]

**Table S1.** List of the repeats number obtained for each strain at each VNTR locus used in this study.

| Strain                                 | TR10I | TR14I | TR15I | TR30I | TR1II | TR2II | TR3II | TR39II | TR11II | TR19II | TR64II | MLVA type | biovar | Countries | Year |
|----------------------------------------|-------|-------|-------|-------|-------|-------|-------|--------|--------|--------|--------|-----------|--------|-----------|------|
| CFBP 4909 <sup>PT</sup> /<br>ICMP 9617 | 14    | 4     | 2     | 3     | 1     | 4     | 2     | 14     | 1      | 3      | 3      |           | 1      | Japan     | 1984 |
| ICMP 19071                             | 12    | 6     | 2     | 3     | 1     | 3     | 2     | 10     | 1      | 5      | 3      |           | 2      | Korea     | 1994 |
| HWD3                                   | 7     | 5     | 2     | 1     | 3     | 2     | 3     | 12     | 2      | 4      | 7      | 1         | 3      | Chine     | 2012 |
| JF8                                    | 7     | 5     | 2     | 1     | 3     | 2     | 3     | 12     | 2      | 4      | 7      | 1         | 3      | Chine     | 2012 |
| AHPP1                                  | 7     | 5     | 2     | 1     | 3     | 2     | 3     | 11     | 2      | 4      | 7      | 2         | 3      | Chine     | 2012 |
| GC31                                   | 14    | 5     | 2     | 1     | 3     | 2     | 5     | 17     | 3      | 5      | 4      | 3         | 3      | Chine     | 2012 |
| JZGMC1                                 | 18    | 5     | 2     | 1     | 3     | 2     | 3     | 14     | 3      | 9      | 5      | 4         | 3      | Chine     | 2013 |
| SCHY9                                  | 18    | 5     | 2     | 1     | 3     | 2     | 3     | 15     | 3      | 7      | 5      | 5         | 3      | Chine     | 2012 |
| T5                                     | 18    | 5     | 2     | 3     | 3     | 2     | 3     | 6      | 3      | 9      | 5      | 6         | 3      | Ita       | 2010 |
| UOM1                                   | 18    | 5     | 2     | 3     | 3     | 2     | 3     | 6      | 4      | 8      | 5      | 7         | 3      | Ita       | 2010 |
| UOM2                                   | 18    | 5     | 2     | 3     | 3     | 2     | 3     | 6      | 4      | 8      | 5      | 7         | 3      | Ita       | 2010 |
| 1.1                                    | 18    | 5     | 2     | 3     | 3     | 2     | 3     | 6      | 3      | 8      | 5      | 8         | 3      | Ita       | 2010 |
| 10.6                                   | 18    | 5     | 2     | 3     | 3     | 2     | 3     | 6      | 3      | 8      | 5      | 8         | 3      | Ita       | 2010 |
| 17460,1 /<br>LSV 46.19                 | 18    | 5     | 2     | 3     | 3     | 2     | 3     | 6      | 3      | 8      | 5      | 8         | 3      | Ita       | 2012 |
| 17704,1 /<br>LSV 46.20                 | 18    | 5     | 2     | 3     | 3     | 2     | 3     | 6      | 3      | 8      | 5      | 8         | 3      | Ita       | 2012 |
| 2.2                                    | 18    | 5     | 2     | 3     | 3     | 2     | 3     | 6      | 3      | 8      | 5      | 8         | 3      | Ita       | 2010 |
| 4.2                                    | 18    | 5     | 2     | 3     | 3     | 2     | 3     | 6      | 3      | 8      | 5      | 8         | 3      | Ita       | 2010 |
| 4.4                                    | 18    | 5     | 2     | 3     | 3     | 2     | 3     | 6      | 3      | 8      | 5      | 8         | 3      | Ita       | 2010 |
| 4.6                                    | 18    | 5     | 2     | 3     | 3     | 2     | 3     | 6      | 3      | 8      | 5      | 8         | 3      | Ita       | 2010 |
| E7                                     | 18    | 5     | 2     | 3     | 3     | 2     | 3     | 6      | 3      | 8      | 5      | 8         | 3      | Ita       | 2010 |
| H1.2                                   | 18    | 5     | 2     | 3     | 3     | 2     | 3     | 6      | 3      | 8      | 5      | 8         | 3      | Ita       | 2010 |
| H1.3                                   | 18    | 5     | 2     | 3     | 3     | 2     | 3     | 6      | 3      | 8      | 5      | 8         | 3      | Ita       | 2010 |
| H1.4                                   | 18    | 5     | 2     | 3     | 3     | 2     | 3     | 6      | 3      | 8      | 5      | 8         | 3      | Ita       | 2010 |
| 2.1                                    | 18    | 5     | 2     | 3     | 3     | 2     | 4     | 6      | 3      | 8      | 5      | 9         | 3      | Ita       | 2010 |

|           |    |   |   |   |   |   |   |   |   |    |   |    |   |    |      |
|-----------|----|---|---|---|---|---|---|---|---|----|---|----|---|----|------|
| CFBP 8100 | 18 | 5 | 2 | 3 | 3 | 3 | 3 | 6 | 3 | 8  | 5 | 10 | 3 | Fr | 2013 |
| LSV 36.45 | 18 | 5 | 2 | 3 | 3 | 3 | 3 | 6 | 3 | 8  | 5 | 10 | 3 | Fr | 2010 |
| LSV 37.37 | 18 | 5 | 2 | 3 | 3 | 3 | 3 | 6 | 3 | 8  | 5 | 10 | 3 | Fr | 2011 |
| LSV 37.64 | 18 | 5 | 2 | 3 | 3 | 3 | 3 | 6 | 3 | 8  | 5 | 10 | 3 | Fr | 2011 |
| LSV 38.08 | 18 | 5 | 2 | 3 | 3 | 3 | 3 | 6 | 3 | 8  | 5 | 10 | 3 | Fr | 2011 |
| LSV 38.13 | 18 | 5 | 2 | 3 | 3 | 3 | 3 | 6 | 3 | 8  | 5 | 10 | 3 | Fr | 2011 |
| LSV 38.14 | 18 | 5 | 2 | 3 | 3 | 3 | 3 | 6 | 3 | 8  | 5 | 10 | 3 | Fr | 2011 |
| LSV 38.79 | 18 | 5 | 2 | 3 | 3 | 3 | 3 | 6 | 3 | 8  | 5 | 10 | 3 | Fr | 2011 |
| LSV 38.80 | 18 | 5 | 2 | 3 | 3 | 3 | 3 | 6 | 3 | 8  | 5 | 10 | 3 | Fr | 2011 |
| LSV 39.36 | 18 | 5 | 2 | 3 | 3 | 3 | 3 | 6 | 3 | 8  | 5 | 10 | 3 | Fr | 2011 |
| LSV 40.52 | 18 | 5 | 2 | 3 | 3 | 3 | 3 | 6 | 3 | 8  | 5 | 10 | 3 | Fr | 2011 |
| LSV 40.53 | 18 | 5 | 2 | 3 | 3 | 3 | 3 | 6 | 3 | 8  | 5 | 10 | 3 | Fr | 2011 |
| LSV 41.06 | 18 | 5 | 2 | 3 | 3 | 3 | 3 | 6 | 3 | 8  | 5 | 10 | 3 | Fr | 2012 |
| LSV 41.18 | 18 | 5 | 2 | 3 | 3 | 3 | 3 | 6 | 3 | 8  | 5 | 10 | 3 | Fr | 2012 |
| LSV 41.56 | 18 | 5 | 2 | 3 | 3 | 3 | 3 | 6 | 3 | 8  | 5 | 10 | 3 | Fr | 2012 |
| LSV 42.61 | 18 | 5 | 2 | 3 | 3 | 3 | 3 | 6 | 3 | 8  | 5 | 10 | 3 | Fr | 2013 |
| LSV 42.64 | 18 | 5 | 2 | 3 | 3 | 3 | 3 | 6 | 3 | 8  | 5 | 10 | 3 | Fr | 2013 |
| LSV 42.72 | 18 | 5 | 2 | 3 | 3 | 3 | 3 | 6 | 3 | 8  | 5 | 10 | 3 | Fr | 2013 |
| LSV 43.34 | 18 | 5 | 2 | 3 | 3 | 3 | 3 | 6 | 3 | 8  | 5 | 10 | 3 | Fr | 2013 |
| LSV 43.56 | 18 | 5 | 2 | 3 | 3 | 3 | 3 | 6 | 3 | 8  | 5 | 10 | 3 | Fr | 2013 |
| LSV 44.53 | 18 | 5 | 2 | 3 | 3 | 3 | 3 | 6 | 3 | 8  | 5 | 10 | 3 | Fr | 2013 |
| LSV 37.29 | 18 | 5 | 2 | 3 | 3 | 3 | 3 | 6 | 4 | 8  | 5 | 11 | 3 | Fr | 2011 |
| LSV 37.32 | 18 | 5 | 2 | 3 | 3 | 3 | 3 | 6 | 4 | 8  | 5 | 11 | 3 | Fr | 2011 |
| LSV 41.10 | 18 | 5 | 2 | 3 | 3 | 3 | 3 | 6 | 4 | 8  | 5 | 11 | 3 | Fr | 2012 |
| LSV 41.12 | 18 | 5 | 2 | 3 | 3 | 3 | 3 | 6 | 4 | 8  | 5 | 11 | 3 | Fr | 2012 |
| LSV 39.12 | 13 | 5 | 2 | 3 | 3 | 3 | 3 | 6 | 3 | 8  | 5 | 12 | 3 | Fr | 2011 |
| LSV 38.04 | 17 | 5 | 2 | 3 | 3 | 3 | 3 | 6 | 3 | 7  | 5 | 13 | 3 | Fr | 2011 |
| LSV 43.67 | 17 | 5 | 2 | 3 | 3 | 3 | 3 | 6 | 3 | 7  | 5 | 13 | 3 | Fr | 2013 |
| LSV 44.06 | 17 | 5 | 2 | 3 | 3 | 3 | 3 | 6 | 3 | 7  | 5 | 13 | 3 | Fr | 2013 |
| LSV 36.46 | 17 | 5 | 2 | 3 | 3 | 3 | 3 | 6 | 3 | 10 | 5 | 14 | 3 | Fr | 2010 |

|                          |    |   |   |   |   |   |   |    |   |    |   |    |   |       |      |
|--------------------------|----|---|---|---|---|---|---|----|---|----|---|----|---|-------|------|
| LSV 36.47                | 17 | 5 | 2 | 3 | 3 | 3 | 3 | 6  | 3 | 10 | 5 | 14 | 3 | Fr    | 2010 |
| LSV 40.61                | 17 | 5 | 2 | 3 | 3 | 3 | 3 | 6  | 3 | 10 | 5 | 14 | 3 | Fr    | 2012 |
| LSV 42.23                | 17 | 5 | 2 | 3 | 3 | 3 | 3 | 6  | 3 | 10 | 5 | 14 | 3 | Fr    | 2012 |
| CFBP 7910                | 17 | 5 | 2 | 3 | 4 | 3 | 3 | 6  | 3 | 8  | 5 | 15 | 3 | Fr    | 2012 |
| LSV 37.13                | 17 | 5 | 2 | 3 | 4 | 3 | 3 | 6  | 3 | 8  | 5 | 15 | 3 | Fr    | 2011 |
| LSV 41.32                | 17 | 5 | 2 | 3 | 4 | 3 | 3 | 6  | 3 | 8  | 5 | 15 | 3 | Fr    | 2012 |
| LSV 43.54                | 17 | 5 | 2 | 3 | 4 | 3 | 3 | 6  | 3 | 8  | 5 | 15 | 3 | Fr    | 2013 |
| LSV 43.66                | 17 | 5 | 2 | 3 | 4 | 3 | 3 | 6  | 3 | 8  | 5 | 15 | 3 | Fr    | 2013 |
| LSV 44.07                | 17 | 5 | 2 | 3 | 4 | 3 | 3 | 6  | 3 | 8  | 5 | 15 | 3 | Fr    | 2013 |
| LSV 44.56                | 17 | 5 | 2 | 3 | 3 | 3 | 3 | 5  | 3 | 8  | 5 | 16 | 3 | Fr    | 2013 |
| LSV 37.21                | 17 | 5 | 3 | 3 | 3 | 3 | 3 | 6  | 3 | 8  | 5 | 17 | 3 | Fr    | 2011 |
| E4                       | 16 | 5 | 2 | 3 | 3 | 2 | 3 | 6  | 3 | 8  | 5 | 18 | 3 | Ita   | 2010 |
| E-AB                     | 16 | 5 | 2 | 3 | 3 | 2 | 3 | 6  | 3 | 8  | 5 | 18 | 3 | Ita   | 2010 |
| ICMP 19439               | 16 | 5 | 2 | 3 | 3 | 3 | 3 | 11 | 3 | 8  | 5 | 19 | 3 | Chile | 2010 |
| ICMP 19455               | 16 | 5 | 2 | 3 | 3 | 3 | 3 | 11 | 3 | 8  | 5 | 19 | 3 | Chile | 2010 |
| ICMP 19457               | 16 | 5 | 2 | 3 | 3 | 3 | 3 | 11 | 3 | 8  | 5 | 19 | 3 | Chile | 2010 |
| LSV 42.70                | 16 | 8 | 2 | 3 | 3 | 3 | 3 | 6  | 3 | 8  | 5 | 20 | 3 | Fr    | 2013 |
| LSV 43.25                | 16 | 8 | 2 | 3 | 3 | 3 | 3 | 6  | 3 | 8  | 5 | 20 | 3 | Fr    | 2013 |
| LSV 43.38                | 16 | 8 | 2 | 3 | 3 | 3 | 3 | 6  | 3 | 8  | 5 | 20 | 3 | Fr    | 2013 |
| CFBP 7287 /<br>LSV 40.47 | 16 | 5 | 2 | 3 | 3 | 3 | 3 | 6  | 3 | 8  | 5 | 21 | 3 | Ita   | 2008 |
| CFBP 8031                | 16 | 5 | 2 | 3 | 3 | 3 | 3 | 6  | 3 | 8  | 5 | 21 | 3 | Fr    | 2011 |
| CFBP 8036                | 16 | 5 | 2 | 3 | 3 | 3 | 3 | 6  | 3 | 8  | 5 | 21 | 3 | Fr    | 2011 |
| CFBP 8055                | 16 | 5 | 2 | 3 | 3 | 3 | 3 | 6  | 3 | 8  | 5 | 21 | 3 | Fr    | 2011 |
| CFBP 8102                | 16 | 5 | 2 | 3 | 3 | 3 | 3 | 6  | 3 | 8  | 5 | 21 | 3 | Fr    | 2013 |
| LSV 39.24                | 16 | 5 | 2 | 3 | 3 | 3 | 3 | 6  | 3 | 8  | 5 | 21 | 3 | Fr    | 2011 |
| LSV 41.28                | 16 | 5 | 2 | 3 | 3 | 3 | 3 | 6  | 3 | 8  | 5 | 21 | 3 | Fr    | 2012 |
| LSV 41.51                | 16 | 5 | 2 | 3 | 3 | 3 | 3 | 6  | 3 | 8  | 5 | 21 | 3 | Fr    | 2012 |
| LSV 42.22                | 16 | 5 | 2 | 3 | 3 | 3 | 3 | 6  | 3 | 8  | 5 | 21 | 3 | Fr    | 2012 |
| CFBP 8059                | 19 | 5 | 2 | 3 | 2 | 3 | 3 | 6  | 3 | 8  | 5 | 22 | 3 | Fr    | 2012 |

|                        |    |   |   |   |   |   |   |    |   |   |   |    |   |       |      |
|------------------------|----|---|---|---|---|---|---|----|---|---|---|----|---|-------|------|
| LSV 41.57              | 19 | 5 | 2 | 3 | 2 | 3 | 3 | 6  | 3 | 8 | 5 | 22 | 3 | Fr    | 2012 |
| LSV 43.37              | 19 | 5 | 2 | 3 | 2 | 3 | 3 | 6  | 3 | 8 | 5 | 22 | 3 | Fr    | 2013 |
| LSV 43.77              | 19 | 5 | 2 | 3 | 3 | 3 | 3 | 6  | 3 | 8 | 5 | 23 | 3 | Fr    | 2013 |
| LSV 43.36              | 14 | 8 | 2 | 3 | 3 | 3 | 3 | 6  | 3 | 8 | 5 | 24 | 3 | Fr    | 2013 |
| LSV 42.77              | 14 | 5 | 2 | 3 | 3 | 3 | 3 | 6  | 4 | 7 | 5 | 25 | 3 | Fr    | 2013 |
| LSV 40.81              | 14 | 5 | 2 | 3 | 3 | 3 | 3 | 6  | 4 | 8 | 5 | 26 | 3 | Fr    | 2012 |
| LSV 40.63              | 14 | 5 | 2 | 3 | 3 | 3 | 3 | 6  | 3 | 8 | 5 | 27 | 3 | Fr    | 2012 |
| LSV 41.19              | 14 | 5 | 2 | 3 | 3 | 3 | 3 | 6  | 3 | 8 | 5 | 27 | 3 | Fr    | 2012 |
| LSV 44.61              | 14 | 5 | 2 | 3 | 3 | 3 | 3 | 6  | 3 | 8 | 5 | 27 | 3 | Fr    | 2013 |
| CFBP 8097              | 17 | 6 | 2 | 3 | 2 | 3 | 3 | 6  | 3 | 8 | 5 | 28 | 3 | Fr    | 2013 |
| LSV 41.22              | 17 | 6 | 2 | 3 | 2 | 3 | 3 | 6  | 3 | 8 | 5 | 28 | 3 | Fr    | 2012 |
| WT2                    | 10 | 5 | 2 | 1 | 2 | 3 | 3 | 14 | 3 | 4 | 1 | 29 | 3 | Chine | 2013 |
| SH8                    | 10 | 5 | 2 | 1 | 2 | 3 | 3 | 14 | 3 | 4 | 5 | 30 | 3 | Chine | 2013 |
| LSV 43.55              | 21 | 5 | 2 | 3 | 2 | 3 | 3 | 6  | 3 | 6 | 5 | 31 | 3 | Fr    | 2013 |
| LSV 37.75              | 21 | 5 | 2 | 3 | 2 | 3 | 3 | 6  | 3 | 8 | 5 | 32 | 3 | Fr    | 2011 |
| LSV 39.76              | 17 | 5 | 2 | 3 | 2 | 3 | 3 | 6  | 3 | 8 | 5 | 33 | 3 | Fr    | 2011 |
| 3.2                    | 15 | 5 | 2 | 3 | 3 | 2 | 3 | 6  | 3 | 8 | 5 | 34 | 3 | Ita   | 2010 |
| 1.2                    | 17 | 5 | 2 | 3 | 3 | 2 | 3 | 6  | 3 | 7 | 5 | 35 | 3 | Ita   | 2010 |
| 3.8                    | 17 | 5 | 2 | 3 | 3 | 2 | 3 | 8  | 3 | 8 | 5 | 36 | 3 | Ita   | 2010 |
| SP3                    | 17 | 5 | 2 | 3 | 3 | 2 | 3 | 8  | 3 | 8 | 5 | 36 | 3 | Ita   | 2010 |
| 21726,1 /<br>LSV 46.22 | 17 | 5 | 4 | 4 | 3 | 2 | 3 | 6  | 3 | 8 | 5 | 37 | 3 | Ita   | 2013 |
| 21736,1 /<br>LSV 46.23 | 17 | 5 | 4 | 4 | 3 | 2 | 3 | 6  | 3 | 8 | 5 | 37 | 3 | Ita   | 2013 |
| 10638                  | 17 | 5 | 2 | 3 | 3 | 2 | 3 | 14 | 3 | 8 | 5 | 38 | 3 | NZ    | 2010 |
| 10787                  | 17 | 5 | 2 | 3 | 3 | 2 | 3 | 14 | 3 | 8 | 5 | 38 | 3 | NZ    | 2010 |
| 11266                  | 17 | 5 | 2 | 3 | 3 | 2 | 3 | 14 | 3 | 8 | 5 | 38 | 3 | NZ    | 2010 |
| 11268                  | 17 | 5 | 2 | 3 | 3 | 2 | 3 | 14 | 3 | 8 | 5 | 38 | 3 | NZ    | 2010 |
| 11282                  | 17 | 5 | 2 | 3 | 3 | 2 | 3 | 14 | 3 | 8 | 5 | 38 | 3 | NZ    | 2010 |
| 11283                  | 17 | 5 | 2 | 3 | 3 | 2 | 3 | 14 | 3 | 8 | 5 | 38 | 3 | NZ    | 2010 |

|                          |    |   |   |   |   |   |   |    |   |   |   |    |   |     |      |
|--------------------------|----|---|---|---|---|---|---|----|---|---|---|----|---|-----|------|
| 11287                    | 17 | 5 | 2 | 3 | 3 | 2 | 3 | 14 | 3 | 8 | 5 | 38 | 3 | NZ  | 2010 |
| 11290                    | 17 | 5 | 2 | 3 | 3 | 2 | 3 | 14 | 3 | 8 | 5 | 38 | 3 | NZ  | 2010 |
| 11293                    | 17 | 5 | 2 | 3 | 3 | 2 | 3 | 14 | 3 | 8 | 5 | 38 | 3 | NZ  | 2010 |
| 11298                    | 17 | 5 | 2 | 3 | 3 | 2 | 3 | 14 | 3 | 8 | 5 | 38 | 3 | NZ  | 2011 |
| 13093                    | 17 | 5 | 2 | 3 | 3 | 2 | 3 | 14 | 3 | 8 | 5 | 38 | 3 | NZ  | 2011 |
| CFBP 7811 /<br>10627     | 17 | 5 | 2 | 3 | 3 | 2 | 3 | 14 | 3 | 8 | 5 | 38 | 3 | NZ  | 2010 |
| 6.6                      | 17 | 5 | 2 | 3 | 3 | 2 | 3 | 6  | 4 | 8 | 5 | 39 | 3 | Ita | 2010 |
| T4                       | 17 | 5 | 2 | 3 | 3 | 2 | 3 | 6  | 4 | 8 | 5 | 39 | 3 | Ita | 2010 |
| T6                       | 17 | 5 | 2 | 3 | 3 | 2 | 3 | 6  | 4 | 8 | 5 | 39 | 3 | Ita | 2010 |
| 1.A                      | 17 | 5 | 2 | 3 | 3 | 2 | 3 | 6  | 3 | 8 | 5 | 40 | 3 | Ita | 2010 |
| 1.B                      | 17 | 5 | 2 | 3 | 3 | 2 | 3 | 6  | 3 | 8 | 5 | 40 | 3 | Ita | 2010 |
| 1.D                      | 17 | 5 | 2 | 3 | 3 | 2 | 3 | 6  | 3 | 8 | 5 | 40 | 3 | Ita | 2010 |
| 1.E                      | 17 | 5 | 2 | 3 | 3 | 2 | 3 | 6  | 3 | 8 | 5 | 40 | 3 | Ita | 2010 |
| 16803,1 /<br>LSV 46.18   | 17 | 5 | 2 | 3 | 3 | 2 | 3 | 6  | 3 | 8 | 5 | 40 | 3 | Ita | 2012 |
| 2.9                      | 17 | 5 | 2 | 3 | 3 | 2 | 3 | 6  | 3 | 8 | 5 | 40 | 3 | Ita | 2010 |
| 21375,1 /<br>LSV 46.21   | 17 | 5 | 2 | 3 | 3 | 2 | 3 | 6  | 3 | 8 | 5 | 40 | 3 | Ita | 2013 |
| 2E                       | 17 | 5 | 2 | 3 | 3 | 2 | 3 | 6  | 3 | 8 | 5 | 40 | 3 | Ita | 2010 |
| 4.1                      | 17 | 5 | 2 | 3 | 3 | 2 | 3 | 6  | 3 | 8 | 5 | 40 | 3 | Ita | 2010 |
| CFBP 7285 /<br>LSV 39.66 | 17 | 5 | 2 | 3 | 3 | 2 | 3 | 6  | 3 | 8 | 5 | 40 | 3 | Ita | 2008 |
| CORE                     | 17 | 5 | 2 | 3 | 3 | 2 | 3 | 6  | 3 | 8 | 5 | 40 | 3 | Ita | 2010 |
| CRA-FRU 11.46            | 17 | 5 | 2 | 3 | 3 | 2 | 3 | 6  | 3 | 8 | 5 | 40 | 3 | Ita | 2010 |
| CRA-FRU 8.15             | 17 | 5 | 2 | 3 | 3 | 2 | 3 | 6  | 3 | 8 | 5 | 40 | 3 | Ita | 2009 |
| D3-b                     | 17 | 5 | 2 | 3 | 3 | 2 | 3 | 6  | 3 | 8 | 5 | 40 | 3 | Ita | 2010 |
| D4                       | 17 | 5 | 2 | 3 | 3 | 2 | 3 | 6  | 3 | 8 | 5 | 40 | 3 | Ita | 2010 |
| H2.1                     | 17 | 5 | 2 | 3 | 3 | 2 | 3 | 6  | 3 | 8 | 5 | 40 | 3 | Ita | 2010 |
| H2.2                     | 17 | 5 | 2 | 3 | 3 | 2 | 3 | 6  | 3 | 8 | 5 | 40 | 3 | Ita | 2010 |
| H2.3                     | 17 | 5 | 2 | 3 | 3 | 2 | 3 | 6  | 3 | 8 | 5 | 40 | 3 | Ita | 2010 |

|           |    |   |   |   |   |   |   |   |   |   |   |    |   |     |      |
|-----------|----|---|---|---|---|---|---|---|---|---|---|----|---|-----|------|
| L1        | 17 | 5 | 2 | 3 | 3 | 2 | 3 | 6 | 3 | 8 | 5 | 40 | 3 | Ita | 2010 |
| L2        | 17 | 5 | 2 | 3 | 3 | 2 | 3 | 6 | 3 | 8 | 5 | 40 | 3 | Ita | 2010 |
| L3        | 17 | 5 | 2 | 3 | 3 | 2 | 3 | 6 | 3 | 8 | 5 | 40 | 3 | Ita | 2010 |
| Psa Ic    | 17 | 5 | 2 | 3 | 3 | 2 | 3 | 6 | 3 | 8 | 5 | 40 | 3 | Ita | 2010 |
| LSV 44.46 | 17 | 5 | 1 | 3 | 3 | 3 | 3 | 6 | 4 | 8 | 5 | 41 | 3 | Fr  | 2013 |
| CFBP 7906 | 17 | 5 | 2 | 3 | 3 | 3 | 3 | 6 | 4 | 8 | 5 | 42 | 3 | Fr  | 2011 |
| CFBP 8026 | 17 | 5 | 2 | 3 | 3 | 3 | 3 | 6 | 4 | 8 | 5 | 42 | 3 | Fr  | 2010 |
| CFBP 8047 | 17 | 5 | 2 | 3 | 3 | 3 | 3 | 6 | 4 | 8 | 5 | 42 | 3 | Fr  | 2010 |
| CFBP 8062 | 17 | 5 | 2 | 3 | 3 | 3 | 3 | 6 | 4 | 8 | 5 | 42 | 3 | Fr  | 2012 |
| CFBP 8092 | 17 | 5 | 2 | 3 | 3 | 3 | 3 | 6 | 4 | 8 | 5 | 42 | 3 | Fr  | 2013 |
| LSV 36.67 | 17 | 5 | 2 | 3 | 3 | 3 | 3 | 6 | 4 | 8 | 5 | 42 | 3 | Fr  | 2010 |
| LSV 36.68 | 17 | 5 | 2 | 3 | 3 | 3 | 3 | 6 | 4 | 8 | 5 | 42 | 3 | Fr  | 2010 |
| LSV 37.24 | 17 | 5 | 2 | 3 | 3 | 3 | 3 | 6 | 4 | 8 | 5 | 42 | 3 | Fr  | 2011 |
| LSV 43.30 | 17 | 5 | 2 | 3 | 3 | 3 | 3 | 6 | 4 | 8 | 5 | 42 | 3 | Fr  | 2013 |
| D1        | 20 | 5 | 2 | 3 | 3 | 2 | 3 | 6 | 3 | 8 | 5 | 43 | 3 | Ita | 2010 |
| CFBP 8060 | 20 | 5 | 2 | 3 | 3 | 3 | 3 | 6 | 3 | 9 | 5 | 44 | 3 | Fr  | 2012 |
| LSV 39.28 | 20 | 5 | 2 | 3 | 2 | 3 | 3 | 6 | 3 | 8 | 5 | 45 | 3 | Fr  | 2011 |
| LSV 40.67 | 20 | 5 | 2 | 3 | 2 | 3 | 3 | 6 | 3 | 8 | 5 | 45 | 3 | Fr  | 2012 |
| LSV 41.34 | 20 | 5 | 2 | 3 | 2 | 3 | 3 | 6 | 3 | 8 | 5 | 45 | 3 | Fr  | 2012 |
| LSV 41.36 | 20 | 5 | 2 | 3 | 2 | 3 | 3 | 6 | 3 | 8 | 5 | 45 | 3 | Fr  | 2012 |
| LSV 41.37 | 20 | 5 | 2 | 3 | 2 | 3 | 3 | 6 | 3 | 8 | 5 | 45 | 3 | Fr  | 2012 |
| LSV 41.50 | 20 | 5 | 2 | 3 | 2 | 3 | 3 | 6 | 3 | 8 | 5 | 45 | 3 | Fr  | 2012 |
| LSV 42.69 | 20 | 5 | 2 | 3 | 2 | 3 | 3 | 6 | 3 | 8 | 5 | 45 | 3 | Fr  | 2013 |
| LSV 43.53 | 20 | 5 | 2 | 3 | 2 | 3 | 3 | 6 | 3 | 8 | 5 | 45 | 3 | Fr  | 2013 |
| CFBP 8065 | 20 | 5 | 2 | 3 | 3 | 3 | 3 | 6 | 3 | 8 | 5 | 46 | 3 | Fr  | 2012 |
| LSV 37.76 | 20 | 5 | 2 | 3 | 3 | 3 | 3 | 6 | 3 | 8 | 5 | 46 | 3 | Fr  | 2011 |
| LSV 38.19 | 20 | 5 | 2 | 3 | 3 | 3 | 3 | 6 | 3 | 8 | 5 | 46 | 3 | Fr  | 2011 |
| LSV 39.03 | 20 | 5 | 2 | 3 | 3 | 3 | 3 | 6 | 3 | 8 | 5 | 46 | 3 | Fr  | 2011 |
| LSV 42.45 | 17 | 5 | 2 | 3 | 3 | 3 | 3 | 6 | 3 | 8 | 3 | 47 | 3 | Fr  | 2012 |
| LSV 42.58 | 17 | 6 | 2 | 3 | 3 | 3 | 3 | 6 | 3 | 8 | 5 | 48 | 3 | Fr  | 2013 |

|                               |    |   |   |   |   |   |   |   |   |   |   |    |   |       |      |
|-------------------------------|----|---|---|---|---|---|---|---|---|---|---|----|---|-------|------|
| LSV 42.67                     | 17 | 6 | 2 | 3 | 3 | 3 | 3 | 6 | 3 | 8 | 5 | 48 | 3 | Fr    | 2013 |
| LSV 42.81                     | 17 | 6 | 2 | 3 | 3 | 3 | 3 | 6 | 3 | 8 | 5 | 48 | 3 | Fr    | 2013 |
| LSV 43.05                     | 17 | 6 | 2 | 3 | 3 | 3 | 3 | 6 | 3 | 8 | 5 | 48 | 3 | Fr    | 2013 |
| LSV 43.15                     | 17 | 6 | 2 | 3 | 3 | 3 | 3 | 6 | 3 | 8 | 5 | 48 | 3 | Fr    | 2013 |
| LSV 37.31                     | 17 | 5 | 2 | 3 | 3 | 3 | 3 | 6 | 2 | 8 | 5 | 49 | 3 | Fr    | 2011 |
| LSV 41.08                     | 17 | 5 | 2 | 3 | 3 | 3 | 3 | 6 | 2 | 8 | 5 | 49 | 3 | Fr    | 2012 |
| LSV 41.09                     | 17 | 5 | 2 | 3 | 3 | 3 | 3 | 6 | 2 | 8 | 5 | 49 | 3 | Fr    | 2012 |
| LSV 39.26                     | 17 | 5 | 2 | 3 | 3 | 3 | 3 | 7 | 3 | 8 | 5 | 50 | 3 | Fr    | 2011 |
| LSV 41.35                     | 17 | 5 | 2 | 3 | 3 | 3 | 3 | 7 | 3 | 8 | 5 | 50 | 3 | Fr    | 2012 |
| LSV 44.22                     | 17 | 5 | 2 | 3 | 3 | 3 | 3 | 7 | 3 | 8 | 5 | 50 | 3 | Fr    | 2013 |
| CFBP 8056                     | 17 | 5 | 2 | 3 | 3 | 3 | 3 | 6 | 3 | 6 | 5 | 51 | 3 | Fr    | 2012 |
| CFBP 8063                     | 17 | 5 | 2 | 3 | 3 | 3 | 3 | 6 | 3 | 9 | 5 | 52 | 3 | Fr    | 2012 |
| CFBP 8089                     | 17 | 5 | 2 | 3 | 3 | 3 | 3 | 6 | 3 | 9 | 5 | 52 | 3 | Fr    | 2013 |
| LSV 41.13                     | 17 | 5 | 2 | 3 | 3 | 3 | 3 | 6 | 3 | 9 | 5 | 52 | 3 | Fr    | 2012 |
| LSV 36.69                     | 15 | 5 | 2 | 3 | 3 | 3 | 3 | 6 | 3 | 8 | 5 | 53 | 3 | Fr    | 2010 |
| LSV 42.59                     | 15 | 5 | 2 | 3 | 3 | 3 | 3 | 6 | 3 | 8 | 5 | 53 | 3 | Fr    | 2013 |
| LSV 43.69                     | 18 | 5 | 2 | 3 | 3 | 3 | 3 | 7 | 3 | 8 | 5 | 54 | 3 | Fr    | 2013 |
| ICMP 18744 /<br>CRA-FRU 11.41 | 17 | 5 | 2 | 3 | 3 | 3 | 3 | 6 | 3 | 8 | 5 | 55 | 3 | Italy | 2010 |
| CFBP 7286 /<br>LSV 40.46      | 17 | 5 | 2 | 3 | 3 | 3 | 3 | 6 | 3 | 8 | 5 | 55 | 3 | Ita   | 2008 |
| CFBP 8025                     | 17 | 5 | 2 | 3 | 3 | 3 | 3 | 6 | 3 | 8 | 5 | 55 | 3 | Fr    | 2010 |
| CFBP 8027                     | 17 | 5 | 2 | 3 | 3 | 3 | 3 | 6 | 3 | 8 | 5 | 55 | 3 | Fr    | 2010 |
| CFBP 8028                     | 17 | 5 | 2 | 3 | 3 | 3 | 3 | 6 | 3 | 8 | 5 | 55 | 3 | Fr    | 2010 |
| CFBP 8029                     | 17 | 5 | 2 | 3 | 3 | 3 | 3 | 6 | 3 | 8 | 5 | 55 | 3 | Fr    | 2010 |
| CFBP 8030                     | 17 | 5 | 2 | 3 | 3 | 3 | 3 | 6 | 3 | 8 | 5 | 55 | 3 | Fr    | 2010 |
| CFBP 8032                     | 17 | 5 | 2 | 3 | 3 | 3 | 3 | 6 | 3 | 8 | 5 | 55 | 3 | Fr    | 2011 |
| CFBP 8033                     | 17 | 5 | 2 | 3 | 3 | 3 | 3 | 6 | 3 | 8 | 5 | 55 | 3 | Fr    | 2011 |
| CFBP 8034                     | 17 | 5 | 2 | 3 | 3 | 3 | 3 | 6 | 3 | 8 | 5 | 55 | 3 | Fr    | 2011 |
| CFBP 8035                     | 17 | 5 | 2 | 3 | 3 | 3 | 3 | 6 | 3 | 8 | 5 | 55 | 3 | Fr    | 2011 |

|           |    |   |   |   |   |   |   |   |   |   |   |    |   |    |      |
|-----------|----|---|---|---|---|---|---|---|---|---|---|----|---|----|------|
| CFBP 8037 | 17 | 5 | 2 | 3 | 3 | 3 | 3 | 6 | 3 | 8 | 5 | 55 | 3 | Fr | 2011 |
| CFBP 8052 | 17 | 5 | 2 | 3 | 3 | 3 | 3 | 6 | 3 | 8 | 5 | 55 | 3 | Fr | 2011 |
| CFBP 8053 | 17 | 5 | 2 | 3 | 3 | 3 | 3 | 6 | 3 | 8 | 5 | 55 | 3 | Fr | 2011 |
| CFBP 8054 | 17 | 5 | 2 | 3 | 3 | 3 | 3 | 6 | 3 | 8 | 5 | 55 | 3 | Fr | 2011 |
| CFBP 8057 | 17 | 5 | 2 | 3 | 3 | 3 | 3 | 6 | 3 | 8 | 5 | 55 | 3 | Fr | 2012 |
| CFBP 8058 | 17 | 5 | 2 | 3 | 3 | 3 | 3 | 6 | 3 | 8 | 5 | 55 | 3 | Fr | 2012 |
| CFBP 8061 | 17 | 5 | 2 | 3 | 3 | 3 | 3 | 6 | 3 | 8 | 5 | 55 | 3 | Fr | 2012 |
| CFBP 8064 | 17 | 5 | 2 | 3 | 3 | 3 | 3 | 6 | 3 | 8 | 5 | 55 | 3 | Fr | 2012 |
| CFBP 8066 | 17 | 5 | 2 | 3 | 3 | 3 | 3 | 6 | 3 | 8 | 5 | 55 | 3 | Fr | 2012 |
| CFBP 8087 | 17 | 5 | 2 | 3 | 3 | 3 | 3 | 6 | 3 | 8 | 5 | 55 | 3 | Fr | 2013 |
| CFBP 8088 | 17 | 5 | 2 | 3 | 3 | 3 | 3 | 6 | 3 | 8 | 5 | 55 | 3 | Fr | 2013 |
| CFBP 8090 | 17 | 5 | 2 | 3 | 3 | 3 | 3 | 6 | 3 | 8 | 5 | 55 | 3 | Fr | 2013 |
| CFBP 8091 | 17 | 5 | 2 | 3 | 3 | 3 | 3 | 6 | 3 | 8 | 5 | 55 | 3 | Fr | 2013 |
| CFBP 8094 | 17 | 5 | 2 | 3 | 3 | 3 | 3 | 6 | 3 | 8 | 5 | 55 | 3 | Fr | 2013 |
| CFBP 8095 | 17 | 5 | 2 | 3 | 3 | 3 | 3 | 6 | 3 | 8 | 5 | 55 | 3 | Fr | 2013 |
| CFBP 8096 | 17 | 5 | 2 | 3 | 3 | 3 | 3 | 6 | 3 | 8 | 5 | 55 | 3 | Fr | 2013 |
| CFBP 8098 | 17 | 5 | 2 | 3 | 3 | 3 | 3 | 6 | 3 | 8 | 5 | 55 | 3 | Fr | 2013 |
| CFBP 8099 | 17 | 5 | 2 | 3 | 3 | 3 | 3 | 6 | 3 | 8 | 5 | 55 | 3 | Fr | 2013 |
| CFBP 8101 | 17 | 5 | 2 | 3 | 3 | 3 | 3 | 6 | 3 | 8 | 5 | 55 | 3 | Fr | 2013 |
| CFBP 8103 | 17 | 5 | 2 | 3 | 3 | 3 | 3 | 6 | 3 | 8 | 5 | 55 | 3 | Fr | 2013 |
| CFBP 8108 | 17 | 5 | 2 | 3 | 3 | 3 | 3 | 6 | 3 | 8 | 5 | 55 | 3 | Fr | 2013 |
| CFBP 8109 | 17 | 5 | 2 | 3 | 3 | 3 | 3 | 6 | 3 | 8 | 5 | 55 | 3 | Fr | 2013 |
| CFBP 8110 | 17 | 5 | 2 | 3 | 3 | 3 | 3 | 6 | 3 | 8 | 5 | 55 | 3 | Fr | 2013 |
| LSV 37.14 | 17 | 5 | 2 | 3 | 3 | 3 | 3 | 6 | 3 | 8 | 5 | 55 | 3 | Fr | 2011 |
| LSV 37.17 | 17 | 5 | 2 | 3 | 3 | 3 | 3 | 6 | 3 | 8 | 5 | 55 | 3 | Fr | 2011 |
| LSV 37.18 | 17 | 5 | 2 | 3 | 3 | 3 | 3 | 6 | 3 | 8 | 5 | 55 | 3 | Fr | 2011 |
| LSV 37.19 | 17 | 5 | 2 | 3 | 3 | 3 | 3 | 6 | 3 | 8 | 5 | 55 | 3 | Fr | 2011 |
| LSV 37.25 | 17 | 5 | 2 | 3 | 3 | 3 | 3 | 6 | 3 | 8 | 5 | 55 | 3 | Fr | 2011 |
| LSV 37.26 | 17 | 5 | 2 | 3 | 3 | 3 | 3 | 6 | 3 | 8 | 5 | 55 | 3 | Fr | 2011 |
| LSV 37.33 | 17 | 5 | 2 | 3 | 3 | 3 | 3 | 6 | 3 | 8 | 5 | 55 | 3 | Fr | 2011 |



|           |    |   |   |   |   |   |   |   |   |   |   |    |   |    |      |
|-----------|----|---|---|---|---|---|---|---|---|---|---|----|---|----|------|
| LSV 37.34 | 17 | 5 | 2 | 3 | 3 | 3 | 3 | 6 | 3 | 8 | 5 | 55 | 3 | Fr | 2011 |
| LSV 37.36 | 17 | 5 | 2 | 3 | 3 | 3 | 3 | 6 | 3 | 8 | 5 | 55 | 3 | Fr | 2011 |
| LSV 37.38 | 17 | 5 | 2 | 3 | 3 | 3 | 3 | 6 | 3 | 8 | 5 | 55 | 3 | Fr | 2011 |
| LSV 37.41 | 17 | 5 | 2 | 3 | 3 | 3 | 3 | 6 | 3 | 8 | 5 | 55 | 3 | Fr | 2011 |
| LSV 37.42 | 17 | 5 | 2 | 3 | 3 | 3 | 3 | 6 | 3 | 8 | 5 | 55 | 3 | Fr | 2011 |
| LSV 37.43 | 17 | 5 | 2 | 3 | 3 | 3 | 3 | 6 | 3 | 8 | 5 | 55 | 3 | Fr | 2011 |
| LSV 37.51 | 17 | 5 | 2 | 3 | 3 | 3 | 3 | 6 | 3 | 8 | 5 | 55 | 3 | Fr | 2011 |
| LSV 37.52 | 17 | 5 | 2 | 3 | 3 | 3 | 3 | 6 | 3 | 8 | 5 | 55 | 3 | Fr | 2011 |
| LSV 37.55 | 17 | 5 | 2 | 3 | 3 | 3 | 3 | 6 | 3 | 8 | 5 | 55 | 3 | Fr | 2011 |
| LSV 37.58 | 17 | 5 | 2 | 3 | 3 | 3 | 3 | 6 | 3 | 8 | 5 | 55 | 3 | Fr | 2011 |
| LSV 37.63 | 17 | 5 | 2 | 3 | 3 | 3 | 3 | 6 | 3 | 8 | 5 | 55 | 3 | Fr | 2011 |
| LSV 37.65 | 17 | 5 | 2 | 3 | 3 | 3 | 3 | 6 | 3 | 8 | 5 | 55 | 3 | Fr | 2011 |
| LSV 37.66 | 17 | 5 | 2 | 3 | 3 | 3 | 3 | 6 | 3 | 8 | 5 | 55 | 3 | Fr | 2011 |
| LSV 37.68 | 17 | 5 | 2 | 3 | 3 | 3 | 3 | 6 | 3 | 8 | 5 | 55 | 3 | Fr | 2011 |
| LSV 37.69 | 17 | 5 | 2 | 3 | 3 | 3 | 3 | 6 | 3 | 8 | 5 | 55 | 3 | Fr | 2011 |
| LSV 37.73 | 17 | 5 | 2 | 3 | 3 | 3 | 3 | 6 | 3 | 8 | 5 | 55 | 3 | Fr | 2011 |
| LSV 37.77 | 17 | 5 | 2 | 3 | 3 | 3 | 3 | 6 | 3 | 8 | 5 | 55 | 3 | Fr | 2011 |
| LSV 37.78 | 17 | 5 | 2 | 3 | 3 | 3 | 3 | 6 | 3 | 8 | 5 | 55 | 3 | Fr | 2011 |
| LSV 37.79 | 17 | 5 | 2 | 3 | 3 | 3 | 3 | 6 | 3 | 8 | 5 | 55 | 3 | Fr | 2011 |
| LSV 37.80 | 17 | 5 | 2 | 3 | 3 | 3 | 3 | 6 | 3 | 8 | 5 | 55 | 3 | Fr | 2011 |
| LSV 38.01 | 17 | 5 | 2 | 3 | 3 | 3 | 3 | 6 | 3 | 8 | 5 | 55 | 3 | Fr | 2011 |
| LSV 38.02 | 17 | 5 | 2 | 3 | 3 | 3 | 3 | 6 | 3 | 8 | 5 | 55 | 3 | Fr | 2011 |
| LSV 38.03 | 17 | 5 | 2 | 3 | 3 | 3 | 3 | 6 | 3 | 8 | 5 | 55 | 3 | Fr | 2011 |
| LSV 38.05 | 17 | 5 | 2 | 3 | 3 | 3 | 3 | 6 | 3 | 8 | 5 | 55 | 3 | Fr | 2011 |
| LSV 38.06 | 17 | 5 | 2 | 3 | 3 | 3 | 3 | 6 | 3 | 8 | 5 | 55 | 3 | Fr | 2011 |
| LSV 38.09 | 17 | 5 | 2 | 3 | 3 | 3 | 3 | 6 | 3 | 8 | 5 | 55 | 3 | Fr | 2011 |
| LSV 38.11 | 17 | 5 | 2 | 3 | 3 | 3 | 3 | 6 | 3 | 8 | 5 | 55 | 3 | Fr | 2011 |
| LSV 38.12 | 17 | 5 | 2 | 3 | 3 | 3 | 3 | 6 | 3 | 8 | 5 | 55 | 3 | Fr | 2011 |
| LSV 38.15 | 17 | 5 | 2 | 3 | 3 | 3 | 3 | 6 | 3 | 8 | 5 | 55 | 3 | Fr | 2011 |
| LSV 38.16 | 17 | 5 | 2 | 3 | 3 | 3 | 3 | 6 | 3 | 8 | 5 | 55 | 3 | Fr | 2011 |

|           |    |   |   |   |   |   |   |   |   |   |   |    |   |    |      |
|-----------|----|---|---|---|---|---|---|---|---|---|---|----|---|----|------|
| LSV 38.22 | 17 | 5 | 2 | 3 | 3 | 3 | 3 | 6 | 3 | 8 | 5 | 55 | 3 | Fr | 2011 |
| LSV 39.02 | 17 | 5 | 2 | 3 | 3 | 3 | 3 | 6 | 3 | 8 | 5 | 55 | 3 | Fr | 2011 |
| LSV 39.06 | 17 | 5 | 2 | 3 | 3 | 3 | 3 | 6 | 3 | 8 | 5 | 55 | 3 | Fr | 2011 |
| LSV 39.11 | 17 | 5 | 2 | 3 | 3 | 3 | 3 | 6 | 3 | 8 | 5 | 55 | 3 | Fr | 2011 |
| LSV 39.13 | 17 | 5 | 2 | 3 | 3 | 3 | 3 | 6 | 3 | 8 | 5 | 55 | 3 | Fr | 2011 |
| LSV 39.14 | 17 | 5 | 2 | 3 | 3 | 3 | 3 | 6 | 3 | 8 | 5 | 55 | 3 | Fr | 2011 |
| LSV 39.23 | 17 | 5 | 2 | 3 | 3 | 3 | 3 | 6 | 3 | 8 | 5 | 55 | 3 | Fr | 2011 |
| LSV 39.25 | 17 | 5 | 2 | 3 | 3 | 3 | 3 | 6 | 3 | 8 | 5 | 55 | 3 | Fr | 2011 |
| LSV 39.29 | 17 | 5 | 2 | 3 | 3 | 3 | 3 | 6 | 3 | 8 | 5 | 55 | 3 | Fr | 2011 |
| LSV 39.30 | 17 | 5 | 2 | 3 | 3 | 3 | 3 | 6 | 3 | 8 | 5 | 55 | 3 | Fr | 2011 |
| LSV 39.38 | 17 | 5 | 2 | 3 | 3 | 3 | 3 | 6 | 3 | 8 | 5 | 55 | 3 | Fr | 2011 |
| LSV 39.39 | 17 | 5 | 2 | 3 | 3 | 3 | 3 | 6 | 3 | 8 | 5 | 55 | 3 | Fr | 2011 |
| LSV 39.40 | 17 | 5 | 2 | 3 | 3 | 3 | 3 | 6 | 3 | 8 | 5 | 55 | 3 | Fr | 2011 |
| LSV 39.41 | 17 | 5 | 2 | 3 | 3 | 3 | 3 | 6 | 3 | 8 | 5 | 55 | 3 | Fr | 2011 |
| LSV 39.44 | 17 | 5 | 2 | 3 | 3 | 3 | 3 | 6 | 3 | 8 | 5 | 55 | 3 | Fr | 2011 |
| LSV 39.45 | 17 | 5 | 2 | 3 | 3 | 3 | 3 | 6 | 3 | 8 | 5 | 55 | 3 | Fr | 2011 |
| LSV 40.10 | 17 | 5 | 2 | 3 | 3 | 3 | 3 | 6 | 3 | 8 | 5 | 55 | 3 | Fr | 2011 |
| LSV 40.11 | 17 | 5 | 2 | 3 | 3 | 3 | 3 | 6 | 3 | 8 | 5 | 55 | 3 | Fr | 2011 |
| LSV 40.13 | 17 | 5 | 2 | 3 | 3 | 3 | 3 | 6 | 3 | 8 | 5 | 55 | 3 | Fr | 2011 |
| LSV 40.20 | 17 | 5 | 2 | 3 | 3 | 3 | 3 | 6 | 3 | 8 | 5 | 55 | 3 | Fr | 2011 |
| LSV 40.22 | 17 | 5 | 2 | 3 | 3 | 3 | 3 | 6 | 3 | 8 | 5 | 55 | 3 | Fr | 2011 |
| LSV 40.23 | 17 | 5 | 2 | 3 | 3 | 3 | 3 | 6 | 3 | 8 | 5 | 55 | 3 | Fr | 2011 |
| LSV 40.30 | 17 | 5 | 2 | 3 | 3 | 3 | 3 | 6 | 3 | 8 | 5 | 55 | 3 | Fr | 2011 |
| LSV 40.33 | 17 | 5 | 2 | 3 | 3 | 3 | 3 | 6 | 3 | 8 | 5 | 55 | 3 | Fr | 2011 |
| LSV 40.34 | 17 | 5 | 2 | 3 | 3 | 3 | 3 | 6 | 3 | 8 | 5 | 55 | 3 | Fr | 2011 |
| LSV 40.58 | 17 | 5 | 2 | 3 | 3 | 3 | 3 | 6 | 3 | 8 | 5 | 55 | 3 | Fr | 2012 |
| LSV 40.62 | 17 | 5 | 2 | 3 | 3 | 3 | 3 | 6 | 3 | 8 | 5 | 55 | 3 | Fr | 2012 |
| LSV 40.64 | 17 | 5 | 2 | 3 | 3 | 3 | 3 | 6 | 3 | 8 | 5 | 55 | 3 | Fr | 2012 |
| LSV 40.65 | 17 | 5 | 2 | 3 | 3 | 3 | 3 | 6 | 3 | 8 | 5 | 55 | 3 | Fr | 2012 |
| LSV 40.66 | 17 | 5 | 2 | 3 | 3 | 3 | 3 | 6 | 3 | 8 | 5 | 55 | 3 | Fr | 2012 |

|           |    |   |   |   |   |   |   |   |   |   |   |    |   |    |      |
|-----------|----|---|---|---|---|---|---|---|---|---|---|----|---|----|------|
| LSV 40.69 | 17 | 5 | 2 | 3 | 3 | 3 | 3 | 6 | 3 | 8 | 5 | 55 | 3 | Fr | 2012 |
| LSV 40.70 | 17 | 5 | 2 | 3 | 3 | 3 | 3 | 6 | 3 | 8 | 5 | 55 | 3 | Fr | 2012 |
| LSV 40.71 | 17 | 5 | 2 | 3 | 3 | 3 | 3 | 6 | 3 | 8 | 5 | 55 | 3 | Fr | 2012 |
| LSV 40.73 | 17 | 5 | 2 | 3 | 3 | 3 | 3 | 6 | 3 | 8 | 5 | 55 | 3 | Fr | 2012 |
| LSV 41.15 | 17 | 5 | 2 | 3 | 3 | 3 | 3 | 6 | 3 | 8 | 5 | 55 | 3 | Fr | 2012 |
| LSV 41.16 | 17 | 5 | 2 | 3 | 3 | 3 | 3 | 6 | 3 | 8 | 5 | 55 | 3 | Fr | 2012 |
| LSV 41.17 | 17 | 5 | 2 | 3 | 3 | 3 | 3 | 6 | 3 | 8 | 5 | 55 | 3 | Fr | 2012 |
| LSV 41.20 | 17 | 5 | 2 | 3 | 3 | 3 | 3 | 6 | 3 | 8 | 5 | 55 | 3 | Fr | 2012 |
| LSV 41.23 | 17 | 5 | 2 | 3 | 3 | 3 | 3 | 6 | 3 | 8 | 5 | 55 | 3 | Fr | 2012 |
| LSV 41.24 | 17 | 5 | 2 | 3 | 3 | 3 | 3 | 6 | 3 | 8 | 5 | 55 | 3 | Fr | 2012 |
| LSV 41.25 | 17 | 5 | 2 | 3 | 3 | 3 | 3 | 6 | 3 | 8 | 5 | 55 | 3 | Fr | 2012 |
| LSV 41.26 | 17 | 5 | 2 | 3 | 3 | 3 | 3 | 6 | 3 | 8 | 5 | 55 | 3 | Fr | 2012 |
| LSV 41.29 | 17 | 5 | 2 | 3 | 3 | 3 | 3 | 6 | 3 | 8 | 5 | 55 | 3 | Fr | 2012 |
| LSV 41.38 | 17 | 5 | 2 | 3 | 3 | 3 | 3 | 6 | 3 | 8 | 5 | 55 | 3 | Fr | 2012 |
| LSV 41.39 | 17 | 5 | 2 | 3 | 3 | 3 | 3 | 6 | 3 | 8 | 5 | 55 | 3 | Fr | 2012 |
| LSV 41.41 | 17 | 5 | 2 | 3 | 3 | 3 | 3 | 6 | 3 | 8 | 5 | 55 | 3 | Fr | 2012 |
| LSV 41.42 | 17 | 5 | 2 | 3 | 3 | 3 | 3 | 6 | 3 | 8 | 5 | 55 | 3 | Fr | 2012 |
| LSV 41.49 | 17 | 5 | 2 | 3 | 3 | 3 | 3 | 6 | 3 | 8 | 5 | 55 | 3 | Fr | 2012 |
| LSV 41.52 | 17 | 5 | 2 | 3 | 3 | 3 | 3 | 6 | 3 | 8 | 5 | 55 | 3 | Fr | 2012 |
| LSV 41.55 | 17 | 5 | 2 | 3 | 3 | 3 | 3 | 6 | 3 | 8 | 5 | 55 | 3 | Fr | 2012 |
| LSV 41.62 | 17 | 5 | 2 | 3 | 3 | 3 | 3 | 6 | 3 | 8 | 5 | 55 | 3 | Fr | 2012 |
| LSV 41.67 | 17 | 5 | 2 | 3 | 3 | 3 | 3 | 6 | 3 | 8 | 5 | 55 | 3 | Fr | 2012 |
| LSV 42.16 | 17 | 5 | 2 | 3 | 3 | 3 | 3 | 6 | 3 | 8 | 5 | 55 | 3 | Fr | 2012 |
| LSV 42.20 | 17 | 5 | 2 | 3 | 3 | 3 | 3 | 6 | 3 | 8 | 5 | 55 | 3 | Fr | 2012 |
| LSV 42.44 | 17 | 5 | 2 | 3 | 3 | 3 | 3 | 6 | 3 | 8 | 5 | 55 | 3 | Fr | 2012 |
| LSV 42.63 | 17 | 5 | 2 | 3 | 3 | 3 | 3 | 6 | 3 | 8 | 5 | 55 | 3 | Fr | 2013 |
| LSV 42.68 | 17 | 5 | 2 | 3 | 3 | 3 | 3 | 6 | 3 | 8 | 5 | 55 | 3 | Fr | 2013 |
| LSV 42.71 | 17 | 5 | 2 | 3 | 3 | 3 | 3 | 6 | 3 | 8 | 5 | 55 | 3 | Fr | 2013 |
| LSV 42.76 | 17 | 5 | 2 | 3 | 3 | 3 | 3 | 6 | 3 | 8 | 5 | 55 | 3 | Fr | 2013 |
| LSV 42.78 | 17 | 5 | 2 | 3 | 3 | 3 | 3 | 6 | 3 | 8 | 5 | 55 | 3 | Fr | 2013 |

|           |    |   |   |   |   |   |   |   |   |   |   |    |   |    |      |
|-----------|----|---|---|---|---|---|---|---|---|---|---|----|---|----|------|
| LSV 42.79 | 17 | 5 | 2 | 3 | 3 | 3 | 3 | 6 | 3 | 8 | 5 | 55 | 3 | Fr | 2013 |
| LSV 42.80 | 17 | 5 | 2 | 3 | 3 | 3 | 3 | 6 | 3 | 8 | 5 | 55 | 3 | Fr | 2013 |
| LSV 43.07 | 17 | 5 | 2 | 3 | 3 | 3 | 3 | 6 | 3 | 8 | 5 | 55 | 3 | Fr | 2013 |
| LSV 43.16 | 17 | 5 | 2 | 3 | 3 | 3 | 3 | 6 | 3 | 8 | 5 | 55 | 3 | Fr | 2013 |
| LSV 43.17 | 17 | 5 | 2 | 3 | 3 | 3 | 3 | 6 | 3 | 8 | 5 | 55 | 3 | Fr | 2013 |
| LSV 43.26 | 17 | 5 | 2 | 3 | 3 | 3 | 3 | 6 | 3 | 8 | 5 | 55 | 3 | Fr | 2013 |
| LSV 43.27 | 17 | 5 | 2 | 3 | 3 | 3 | 3 | 6 | 3 | 8 | 5 | 55 | 3 | Fr | 2013 |
| LSV 43.29 | 17 | 5 | 2 | 3 | 3 | 3 | 3 | 6 | 3 | 8 | 5 | 55 | 3 | Fr | 2013 |
| LSV 43.35 | 17 | 5 | 2 | 3 | 3 | 3 | 3 | 6 | 3 | 8 | 5 | 55 | 3 | Fr | 2013 |
| LSV 43.57 | 17 | 5 | 2 | 3 | 3 | 3 | 3 | 6 | 3 | 8 | 5 | 55 | 3 | Fr | 2013 |
| LSV 43.58 | 17 | 5 | 2 | 3 | 3 | 3 | 3 | 6 | 3 | 8 | 5 | 55 | 3 | Fr | 2013 |
| LSV 43.59 | 17 | 5 | 2 | 3 | 3 | 3 | 3 | 6 | 3 | 8 | 5 | 55 | 3 | Fr | 2013 |
| LSV 43.68 | 17 | 5 | 2 | 3 | 3 | 3 | 3 | 6 | 3 | 8 | 5 | 55 | 3 | Fr | 2013 |
| LSV 43.75 | 17 | 5 | 2 | 3 | 3 | 3 | 3 | 6 | 3 | 8 | 5 | 55 | 3 | Fr | 2013 |
| LSV 43.78 | 17 | 5 | 2 | 3 | 3 | 3 | 3 | 6 | 3 | 8 | 5 | 55 | 3 | Fr | 2013 |
| LSV 44.08 | 17 | 5 | 2 | 3 | 3 | 3 | 3 | 6 | 3 | 8 | 5 | 55 | 3 | Fr | 2013 |
| LSV 44.18 | 17 | 5 | 2 | 3 | 3 | 3 | 3 | 6 | 3 | 8 | 5 | 55 | 3 | Fr | 2013 |
| LSV 44.23 | 17 | 5 | 2 | 3 | 3 | 3 | 3 | 6 | 3 | 8 | 5 | 55 | 3 | Fr | 2013 |
| LSV 44.31 | 17 | 5 | 2 | 3 | 3 | 3 | 3 | 6 | 3 | 8 | 5 | 55 | 3 | Fr | 2013 |
| LSV 44.47 | 17 | 5 | 2 | 3 | 3 | 3 | 3 | 6 | 3 | 8 | 5 | 55 | 3 | Fr | 2013 |
| LSV 44.48 | 17 | 5 | 2 | 3 | 3 | 3 | 3 | 6 | 3 | 8 | 5 | 55 | 3 | Fr | 2013 |
| LSV 44.49 | 17 | 5 | 2 | 3 | 3 | 3 | 3 | 6 | 3 | 8 | 5 | 55 | 3 | Fr | 2013 |
| LSV 44.52 | 17 | 5 | 2 | 3 | 3 | 3 | 3 | 6 | 3 | 8 | 5 | 55 | 3 | Fr | 2013 |
| LSV 44.54 | 17 | 5 | 2 | 3 | 3 | 3 | 3 | 6 | 3 | 8 | 5 | 55 | 3 | Fr | 2013 |
| LSV 44.55 | 17 | 5 | 2 | 3 | 3 | 3 | 3 | 6 | 3 | 8 | 5 | 55 | 3 | Fr | 2013 |
| LSV 44.62 | 17 | 5 | 2 | 3 | 3 | 3 | 3 | 6 | 3 | 8 | 5 | 55 | 3 | Fr | 2013 |
| CFBP 7907 | 14 | 8 | 1 | 3 | 1 | 2 | 1 | 2 | 1 | 1 | 1 | A  | 4 | Fr | 2011 |
| CFBP 8048 | 14 | 8 | 1 | 3 | 1 | 2 | 1 | 2 | 1 | 1 | 1 | A  | 4 | Fr | 2011 |
| CFBP 8051 | 14 | 8 | 1 | 3 | 1 | 2 | 1 | 2 | 1 | 1 | 1 | A  | 4 | Fr | 2011 |
| CFBP 8067 | 14 | 8 | 1 | 3 | 1 | 2 | 1 | 2 | 1 | 1 | 1 | A  | 4 | Fr | 2012 |

|                           |    |   |   |    |   |   |   |   |   |   |   |   |   |     |      |
|---------------------------|----|---|---|----|---|---|---|---|---|---|---|---|---|-----|------|
| CFBP 8085                 | 14 | 8 | 1 | 3  | 1 | 2 | 1 | 2 | 1 | 1 | 1 | A | 4 | Fr  | 2012 |
| CFBP 7951 /<br>ICMP 18807 | 10 | 8 | 1 | 11 | 1 | 2 | 1 | 2 | 1 | 1 | 1 | B | 4 | NZ  | 2010 |
| CFBP 8044 /<br>ICMP 19440 | 7  | 8 | 1 | 3  | 1 | 2 | 1 | 2 | 1 | 1 | 1 | C | 4 | Aus | 2011 |
| CFBP 8045/<br>ICMP 19486  | 7  | 8 | 1 | 3  | 1 | 2 | 1 | 2 | 1 | 1 | 1 | C | 4 | Aus | 1990 |
| CFBP 8046 /<br>ICMP 19441 | 7  | 8 | 1 | 3  | 1 | 2 | 1 | 2 | 1 | 1 | 1 | C | 4 | Aus | 2011 |
| CFBP 8043                 | 7  | 6 | 1 | 3  | 1 | 2 | 1 | 2 | 1 | 2 | 1 | D | 4 | Fr  | 2011 |
| LSV 43.74                 | 7  | 6 | 1 | 3  | 1 | 2 | 1 | 2 | 1 | 2 | 1 | D | 4 | Fr  | 2013 |
| CFBP 8161                 | 7  | 5 | 1 | 3  | 1 | 1 | 1 | 2 | 1 | 1 | 1 | E | 4 | Fr  | 2013 |
| CFBP 7909                 | 12 | 8 | 1 | 3  | 1 | 2 | 1 | 2 | 1 | 1 | 1 | F | 4 | Fr  | 2012 |
| CFBP 8039                 | 12 | 8 | 1 | 3  | 1 | 2 | 1 | 2 | 1 | 1 | 1 | F | 4 | Fr  | 2011 |
| CFBP 8086                 | 12 | 8 | 1 | 3  | 1 | 2 | 1 | 2 | 1 | 1 | 1 | F | 4 | Fr  | 2012 |
| CFBP 8106                 | 12 | 8 | 1 | 3  | 1 | 2 | 1 | 2 | 1 | 1 | 1 | F | 4 | Fr  | 2013 |
| LSV 43.40                 | 12 | 8 | 1 | 3  | 1 | 2 | 1 | 2 | 1 | 1 | 1 | F | 4 | Fr  | 2013 |
| CFBP 8107                 | 12 | 7 | 1 | 3  | 1 | 1 | 1 | 2 | 1 | 1 | 1 | G | 4 | Fr  | 2013 |
| LSV 44.20                 | 16 | 7 | 1 | 3  | 1 | 2 | 1 | 2 | 1 | 1 | 1 | H | 4 | Fr  | 2013 |
| CFBP 7812 /<br>ICMP19098  | 8  | 7 | 1 | 3  | 1 | 3 | 1 | 2 | 1 | 1 | 1 | I | 4 | NZ  | 2010 |
| CFBP 7903 /<br>ICMP18882  | 8  | 7 | 1 | 3  | 1 | 3 | 1 | 2 | 1 | 1 | 1 | I | 4 | NZ  | 2010 |
| CFBP 7904 /<br>ICMP18883  | 8  | 7 | 1 | 3  | 1 | 3 | 1 | 2 | 1 | 1 | 1 | I | 4 | NZ  | 2010 |
| LSV 43.28                 | 11 | 8 | 1 | 3  | 1 | 1 | 1 | 2 | 1 | 1 | 1 | J | 4 | Fr  | 2013 |
| LSV 43.43                 | 11 | 8 | 1 | 3  | 1 | 1 | 1 | 2 | 1 | 1 | 1 | J | 4 | Fr  | 2013 |
| LSV 43.44                 | 11 | 8 | 1 | 3  | 1 | 1 | 1 | 2 | 1 | 1 | 1 | J | 4 | Fr  | 2013 |
| LSV 43.65                 | 11 | 9 | 1 | 3  | 1 | 3 | 1 | 2 | 1 | 1 | 1 | K | 4 | Fr  | 2013 |
| CFBP 7901 /<br>ICMP18803  | 6  | 9 | 1 | 3  | 1 | 2 | 1 | 2 | 1 | 1 | 1 | L | 4 | NZ  | 2010 |

|                           |    |   |   |   |   |   |   |   |   |   |   |   |   |    |      |
|---------------------------|----|---|---|---|---|---|---|---|---|---|---|---|---|----|------|
| CFBP 7902 /<br>ICMP18804  | 6  | 8 | 1 | 3 | 1 | 2 | 1 | 2 | 1 | 1 | 1 | L | 4 | NZ | 2010 |
| CFBP 7950 /<br>ICMP 18806 | 6  | 8 | 1 | 3 | 1 | 1 | 1 | 2 | 1 | 2 | 1 | M | 4 | NZ | 2010 |
| CFBP 8160                 | 15 | 6 | 1 | 3 | 1 | 2 | 1 | 2 | 1 | 1 | 1 | N | 4 | Fr | 2013 |
| CFBP 8038                 | 13 | 8 | 1 | 3 | 1 | 2 | 1 | 2 | 1 | 1 | 1 | O | 4 | Fr | 2011 |
| CFBP 8041                 | 13 | 8 | 1 | 3 | 1 | 2 | 1 | 2 | 1 | 1 | 1 | O | 4 | Fr | 2011 |
| CFBP 8042                 | 13 | 8 | 1 | 3 | 1 | 2 | 1 | 2 | 1 | 1 | 1 | O | 4 | Fr | 2011 |
| CFBP 8105                 | 13 | 8 | 1 | 3 | 1 | 2 | 1 | 2 | 1 | 1 | 1 | O | 4 | Fr | 2013 |
| CFBP 7908                 | 10 | 8 | 1 | 3 | 1 | 2 | 1 | 2 | 1 | 1 | 1 | P | 4 | Fr | 2011 |
| CFBP 8040                 | 10 | 8 | 1 | 3 | 1 | 2 | 1 | 2 | 1 | 1 | 1 | P | 4 | Fr | 2011 |
| CFBP 8049                 | 10 | 8 | 1 | 3 | 1 | 2 | 1 | 2 | 1 | 1 | 1 | P | 4 | Fr | 2011 |
| CFBP 8050                 | 10 | 8 | 1 | 3 | 1 | 2 | 1 | 2 | 1 | 1 | 1 | P | 4 | Fr | 2011 |
| CFBP 8104                 | 10 | 8 | 1 | 3 | 1 | 2 | 1 | 2 | 1 | 1 | 1 | P | 4 | Fr | 2013 |
